# Supplementary material
Source: publisher figshare collection journal article supplement (https://acs.figshare.com/ndownloader/files/4658971)
Supplement: Supplementary file 1 [file 4658971]

## **Supporting Information**

**Title: Preparation of Bovine Serum Albumin Surface-Imprinted Submicron Particles with Magnetic Susceptibility through Core-Shell Miniemulsion Polymerization**

**Authors: Chau Jin Tan, Hong Gap Chua, Kwee Hong Ker, and Yen Wah Tong**

**Table S1.** XPS analysis of the deconvoluted C1s peaks at each surface modification stage.

|                                                                                     | Before modification |                     | After aminolysis |        | After aldehyde functionalization |        |
|-------------------------------------------------------------------------------------|---------------------|---------------------|------------------|--------|----------------------------------|--------|
|                                                                                     | ER <sup>a</sup> (%) | TR <sup>b</sup> (%) | ER (%)           | TR (%) | ER (%)                           | TR (%) |
| 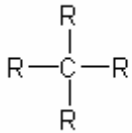   | 44.0                | 40.0                | 58.4             | 50.0   | 57.4                             | 54.6   |
|    | 19.9                | 20.0                | 10.8             | 0.0    | 15.7                             | 0.0    |
|    | 14.6                | 20.0                | 8.7              | 0.0    | 13.0                             | 0.0    |
|  | -                   | -                   | -                | -      | 3.4                              | 9.1    |
|  | 21.5                | 20.0                | -                | -      | -                                | -      |
|  | -                   | -                   | 14.2             | 33.3   | 10.4                             | 27.2   |
|  | -                   | -                   | 7.9              | 16.7   | 0.1                              | 9.1    |

<sup>a</sup>Experimental ratio. <sup>b</sup>Theoretical ratio.

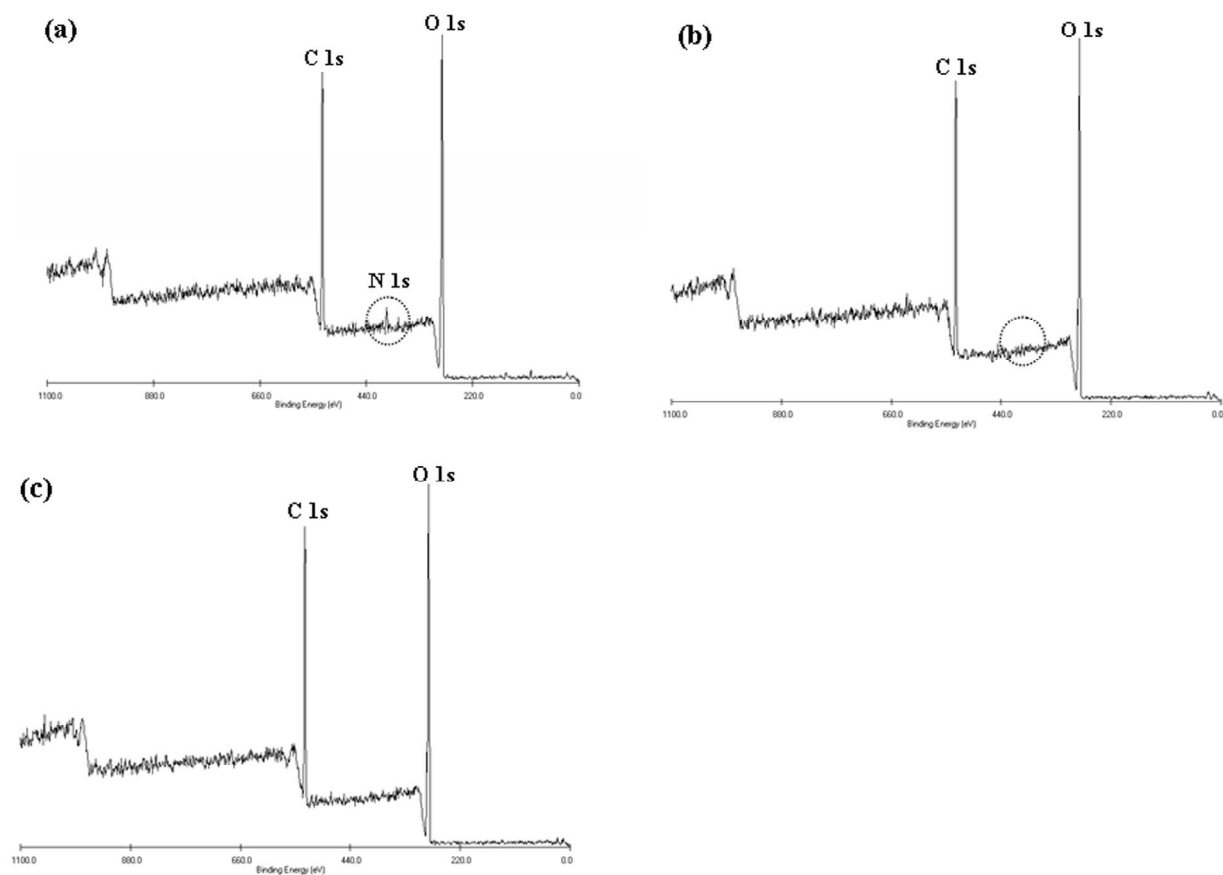

**Figure S1.** XPS wide scan spectra of (a) support core beads after protein immobilization; (b) iMIP particles after template removal by alkaline hydrolysis; (c) iNIP particles.

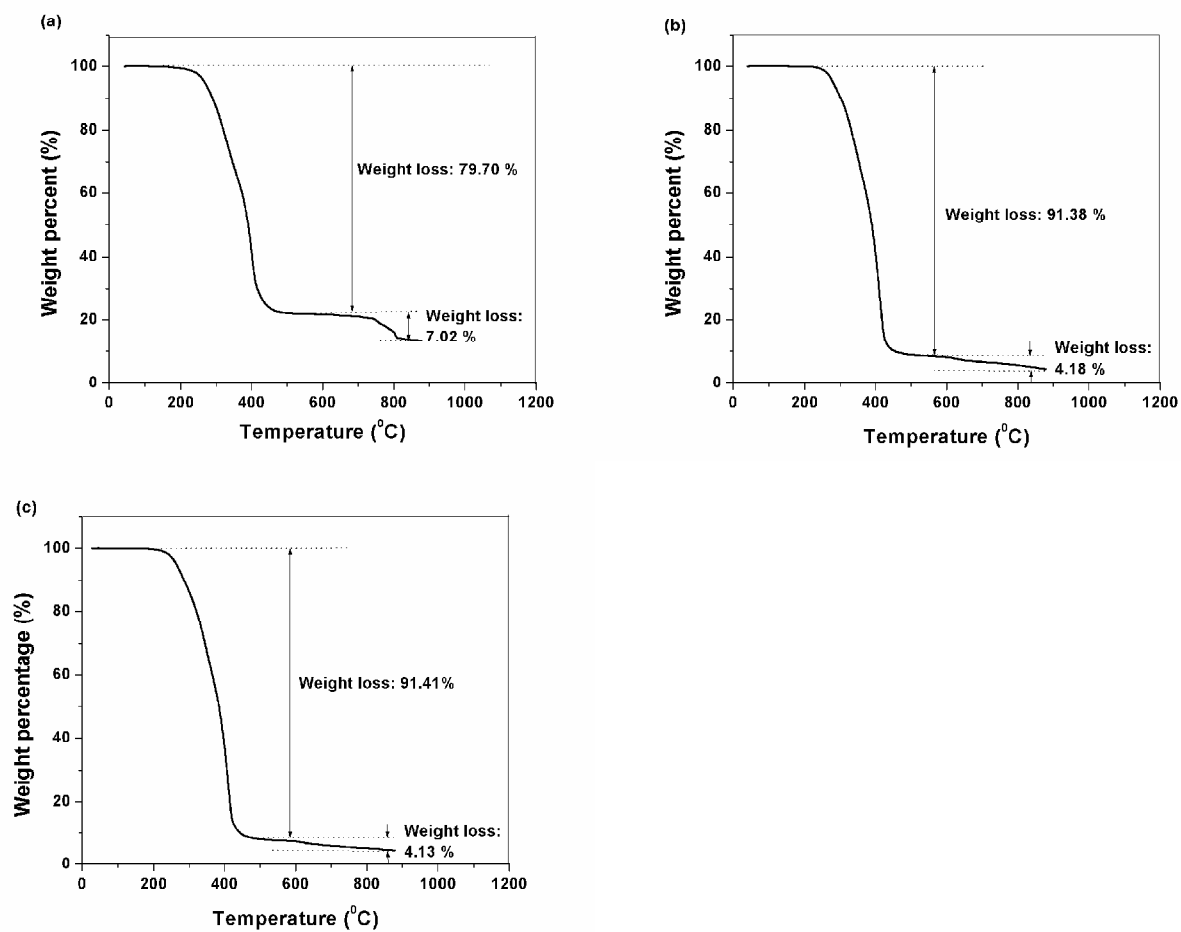

**Figure S2.** TGA thermogram of (a) the support core beads; (b) the iMIP particles; (c) the iNIP particles.

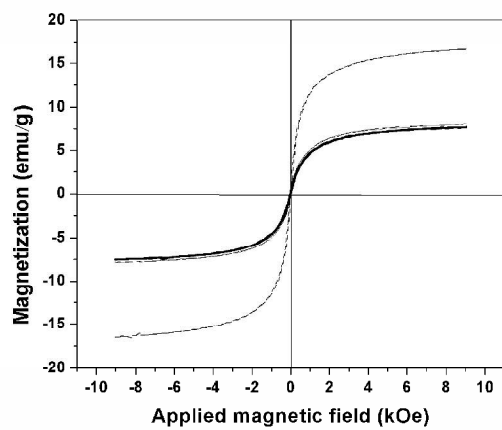

**Figure S3.** The VSM magnetization curves for the core (---,  $S = 16.6$  emu/g), iNIP (—,  $S = 8.0$  emu/g) and iMIP (—,  $S = 7.6$  emu/g) particles.
